# Supplementary material for: A new sensitive PCR assay for one-step detection of 12 IDH1/2 mutations in glioma
Source: PubMed Central journal article supplement (PMC4229941; doi:10.1186/2051-5960-2-58), 2014-06-02
Supplement: 40478_2014_132_MOESM1_ESM.pdf [file 40478_2014_132_MOESM1_ESM.pdf]

**Table S1. Sensitivity of the IDH1/2 PCR assay for the 12 detected and 3 identified IDH1/2 mutations**

| <b>Assay</b> | <b>Mutation</b> | <b>LOD</b> | <b>Assay cutoff *</b> | <b>Sensitivity (%)</b> |
|--------------|-----------------|------------|-----------------------|------------------------|
| R132HMut     | R132H           | 6.87       | 6.87                  | 0.78                   |
| R132CMut     | R132C           | 7.14       | 7.14                  | 1.19                   |
| R172KMut     | R172K           | 8.49       | 8.49                  | 0.61                   |
| R132Mut      | R132H           | 5.50       | 5.34                  | 2.32                   |
|              | R132C           | 5.34       |                       | 4.35                   |
|              | R132L           | 5.42       |                       | 2.30                   |
|              | R132G           | 5.61       |                       | 2.23                   |
|              | R132S           | 5.42       |                       | 2.75                   |
|              | R132V           | 5.56       |                       | 2.24                   |
| R172Mut      | R172K           | 6.42       | 6.42                  | 1.06                   |
|              | R172G           | 6.58       |                       | 3.00                   |
|              | R172M           | 6.66       |                       | 3.31                   |
|              | R172S           | 6.42       |                       | 14.93                  |
|              | R172W           | 6.68       |                       | 2.36                   |
| R100Mut      | R100Q           | 4.65       | 4.65                  | 3.45                   |

LOD: Limit of Detection.

\*A mutation is detected if  $\Delta Ct$  is less or equal to the LOD

**Table S 2. Precision results**

| Assay            | Sample       | Mean $\Delta C_T$ | SD <sub>R</sub> <sup>*</sup> | SD <sub>Run</sub> <sup>†</sup> | SD <sub>Total</sub> <sup>‡</sup> | CV <sub>Total</sub> (%) <sup>‡</sup> | Correct calls rate % (Frequency) |
|------------------|--------------|-------------------|------------------------------|--------------------------------|----------------------------------|--------------------------------------|----------------------------------|
| <b>R132C MUT</b> | WT           | 11.58             | 1.08                         | 0.00                           | 1.11                             | 10                                   | 100% (78/78)                     |
|                  | 5%           | 5.19              | 0.26                         | 0.23                           | 0.46                             | 9                                    | 100% (76/76)                     |
|                  | 10%          | 4.37              | 0.27                         | 0.14                           | 0.48                             | 11                                   | 100% (78/78)                     |
|                  | 30%          | 2.62              | 0.20                         | 0.21                           | 0.46                             | 18                                   | 100% (78/78)                     |
| <b>R132H MUT</b> | WT           | 10.87             | 1.48                         | 0.00                           | 1.48                             | 14                                   | 100% (78/78)                     |
|                  | 5%           | 4.46              | 0.27                         | 0.05                           | 0.31                             | 7                                    | 100% (78/78)                     |
|                  | 10%          | 3.57              | 0.28                         | 0.14                           | 0.31                             | 9                                    | 100% (76/76)                     |
|                  | 30%          | 1.86              | 0.21                         | 0.20                           | 0.30                             | 16                                   | 100% (72/72)                     |
| <b>R172K MUT</b> | WT           | 12.20             | 0.31                         | 0.17                           | 0.39                             | 3                                    | 100% (66/66)                     |
|                  | 5%           | 6.19              | 0.50                         | 0.00                           | 0.63                             | 10                                   | 100% (76/76)                     |
|                  | 10%          | 5.23              | 0.32                         | 0.20                           | 0.48                             | 9                                    | 100% (76/76)                     |
|                  | 30%          | 3.68              | 0.18                         | 0.11                           | 0.36                             | 10                                   | 100% (76/76)                     |
| <b>R100 MUT</b>  | WT           | 7.21              | 0.41                         | 0.27                           | 0.52                             | 7                                    | 100% (70/70)                     |
|                  | 5%           | 3.68              | 0.27                         | 0.16                           | 0.33                             | 9                                    | 100% (76/76)                     |
|                  | 10%          | 2.93              | 0.24                         | 0.15                           | 0.32                             | 11                                   | 100% (76/76)                     |
|                  | 30%          | 1.56              | 0.25                         | 0.07                           | 0.26                             | 17                                   | 100% (76/76)                     |
| <b>R132 MUT</b>  | WT           | 8.01              | 0.76                         | 0.00                           | 0.78                             | 10                                   | 100% (152/152)                   |
|                  | R132H<br>5%  | 4.29              | 0.30                         | 0.15                           | 0.48                             | 11                                   |                                  |
|                  | R132C<br>5%  | 4.44              | 0.30                         | 0.00                           | 0.56                             | 13                                   |                                  |
| <b>R132 MUT</b>  | R132H<br>10% | 3.49              | 0.27                         | 0.22                           | 0.46                             | 13                                   | 99% (151/152)                    |
|                  | R132C<br>10% | 3.69              | 0.27                         | 0.23                           | 0.53                             | 14                                   |                                  |
|                  | R132H<br>30% | 1.87              | 0.21                         | 0.02                           | 0.33                             | 18                                   | 100% (152/152)                   |
|                  | R132C<br>30% | 2.00              | 0.26                         | 0.28                           | 0.59                             | 29                                   |                                  |
| <b>R172 MUT</b>  | WT           | 9.47              | 0.91                         | 0.87                           | 1.45                             | 15                                   | 100% (66/66)                     |
|                  | 5%           | 4.45              | 0.35                         | 0.12                           | 0.56                             | 13                                   | 100% (76/76)                     |
|                  | 10%          | 3.55              | 0.29                         | 0.02                           | 0.53                             | 15                                   | 100% (76/76)                     |
|                  | 30%          | 2.05              | 0.18                         | 0.15                           | 0.47                             | 23                                   | 100% (76/76)                     |

WT: Wild-type; SD: Standard deviation; CV: Coefficient of variation.

\* R: Repeatability; † Run: Between-run reproducibility; ‡ Total: Total precision (including inter-instrument, inter-operator, and inter-lot).

**Table S 3. Analysis of Agreement between the IDH1/2 PCR assay and IDH1 R132H-IHC and Sanger sequencing**

|                                        | <b>Measure of agreement</b> | <b>% (Frequency)</b> | <b>95% CI</b> |
|----------------------------------------|-----------------------------|----------------------|---------------|
| <b>IDH1/2 PCR vs IHC</b>               | Overall percent agreement   | 99.0% (102/103)      | [95.9 - 99.9] |
|                                        | Positive percent agreement  | 98.4% (60/61)        | [91.3 - 99.7] |
|                                        | Negative percent agreement  | 100% (72/72)         | [94.9 - 100]  |
| <b>IDH1/2 PCR vs Sanger Sequencing</b> | Overall percent agreement   | 96.2% (128/133)      | [91.5 - 98.4] |
|                                        | Positive percent agreement  | 100% (67/67)         | [94.6 - 100]  |
|                                        | Negative percent agreement  | 92.4% (61/66)        | [83.5 - 96.7] |

IHC: Immunohistochemistry; PCR: Polymerase chain reaction; CI: Confidence interval.
