# Supplementary material for: A new sensitive PCR assay for one-step detection of 12 IDH1/2 mutations in glioma
Source: PubMed Central journal article supplement (PMC4229941; doi:10.1186/2051-5960-2-58), 2014-06-02

(A) R132 PCR-clamping

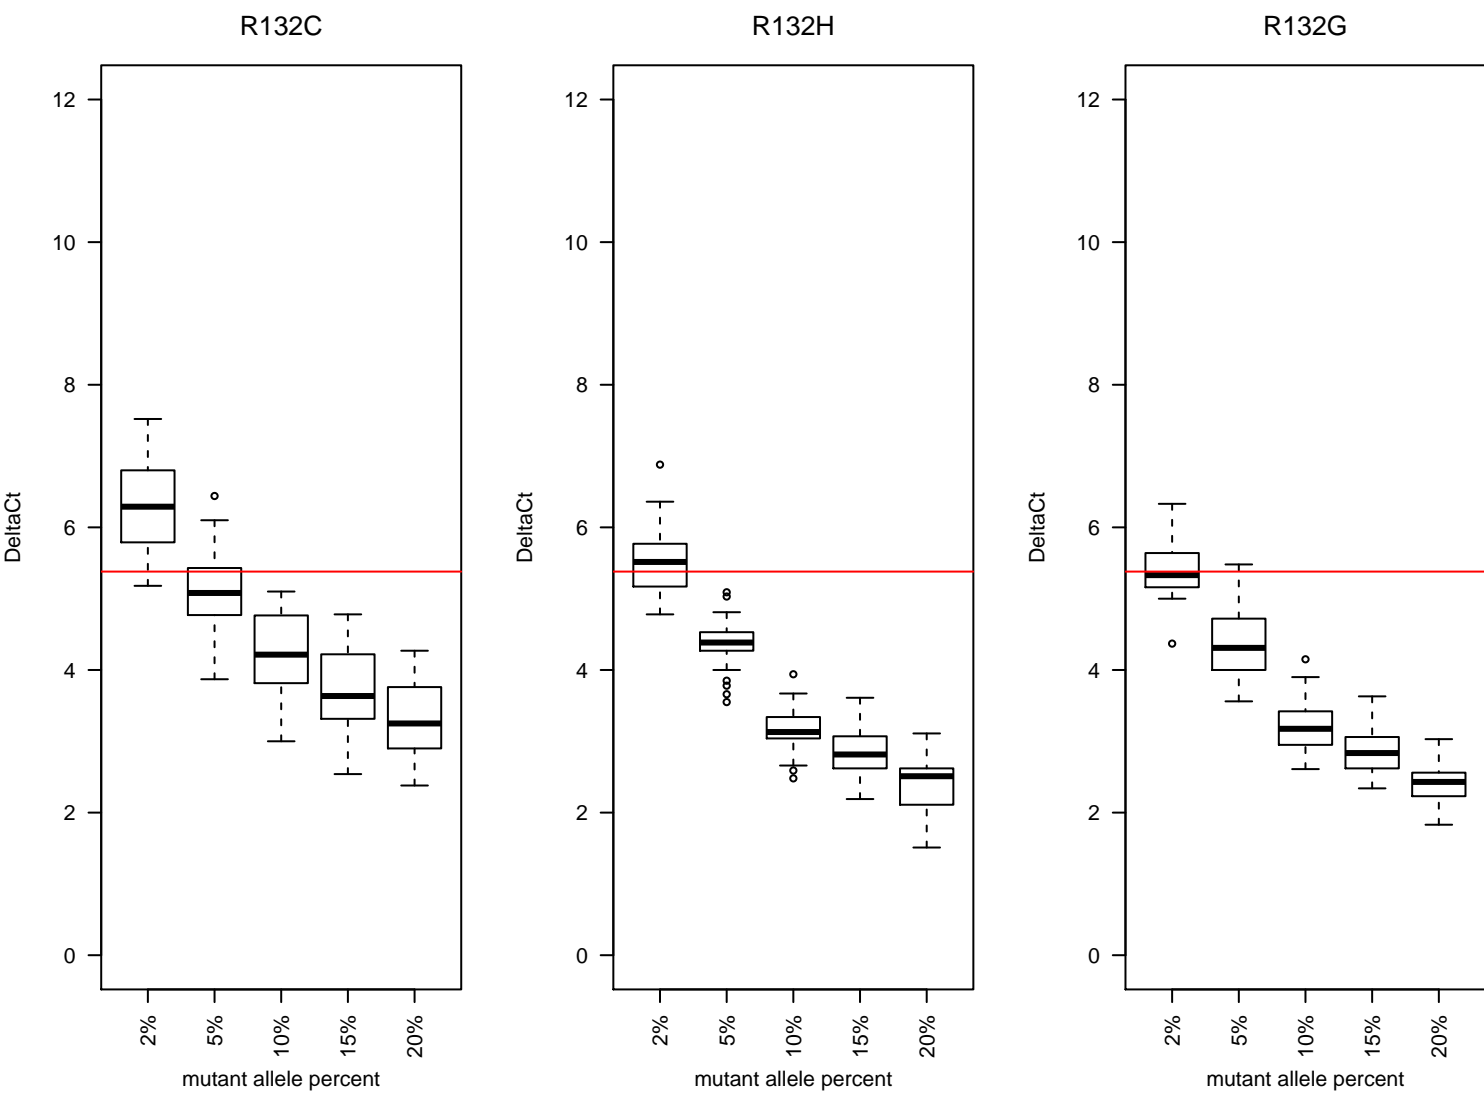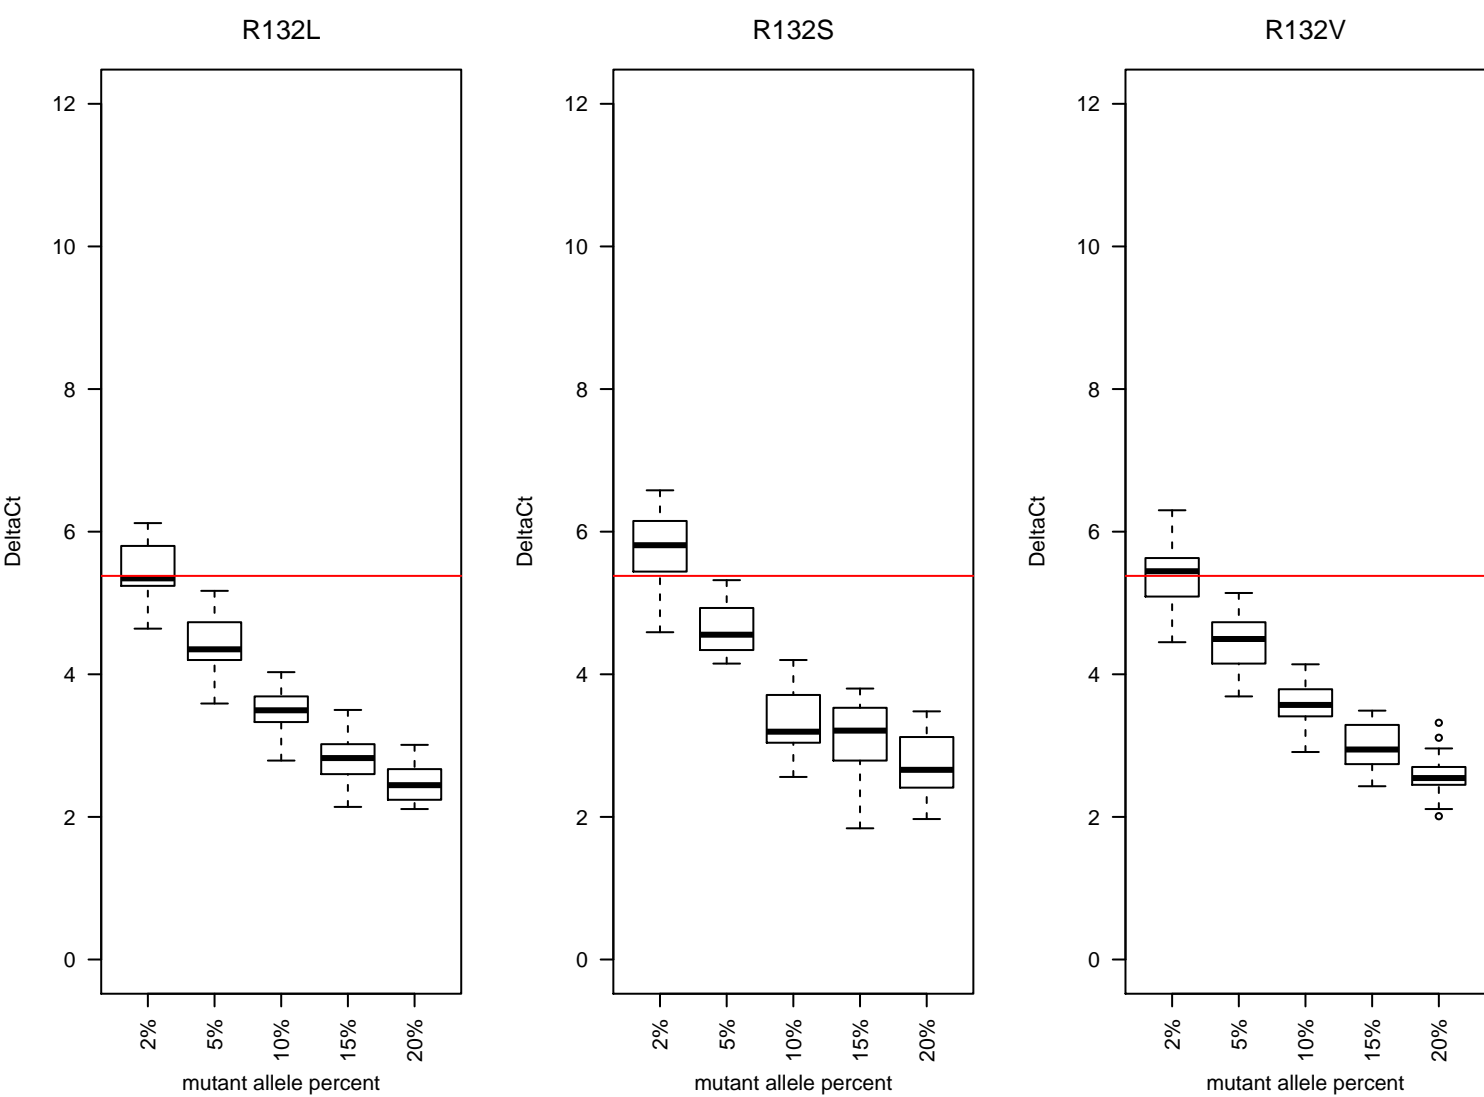

(B) R132 ARMS

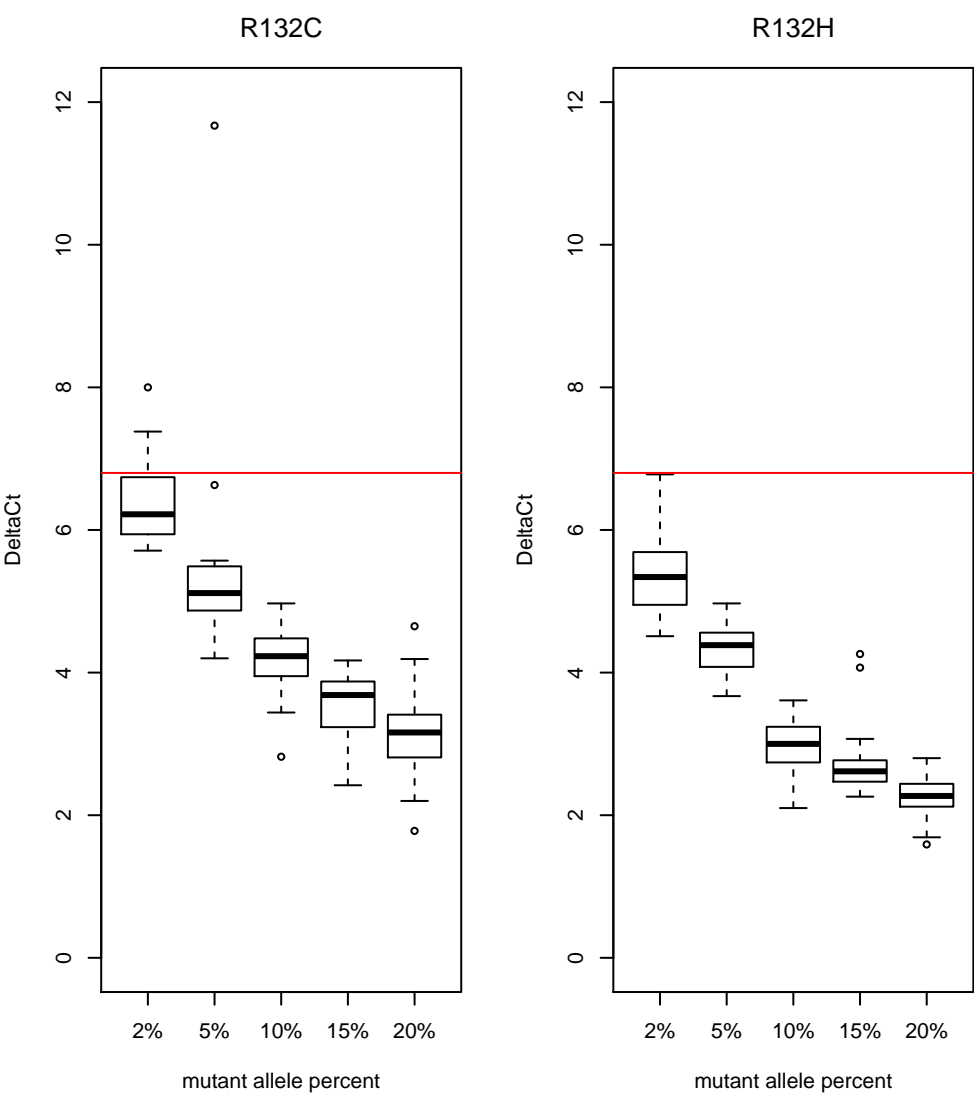

(C) R172 PCR-clamping

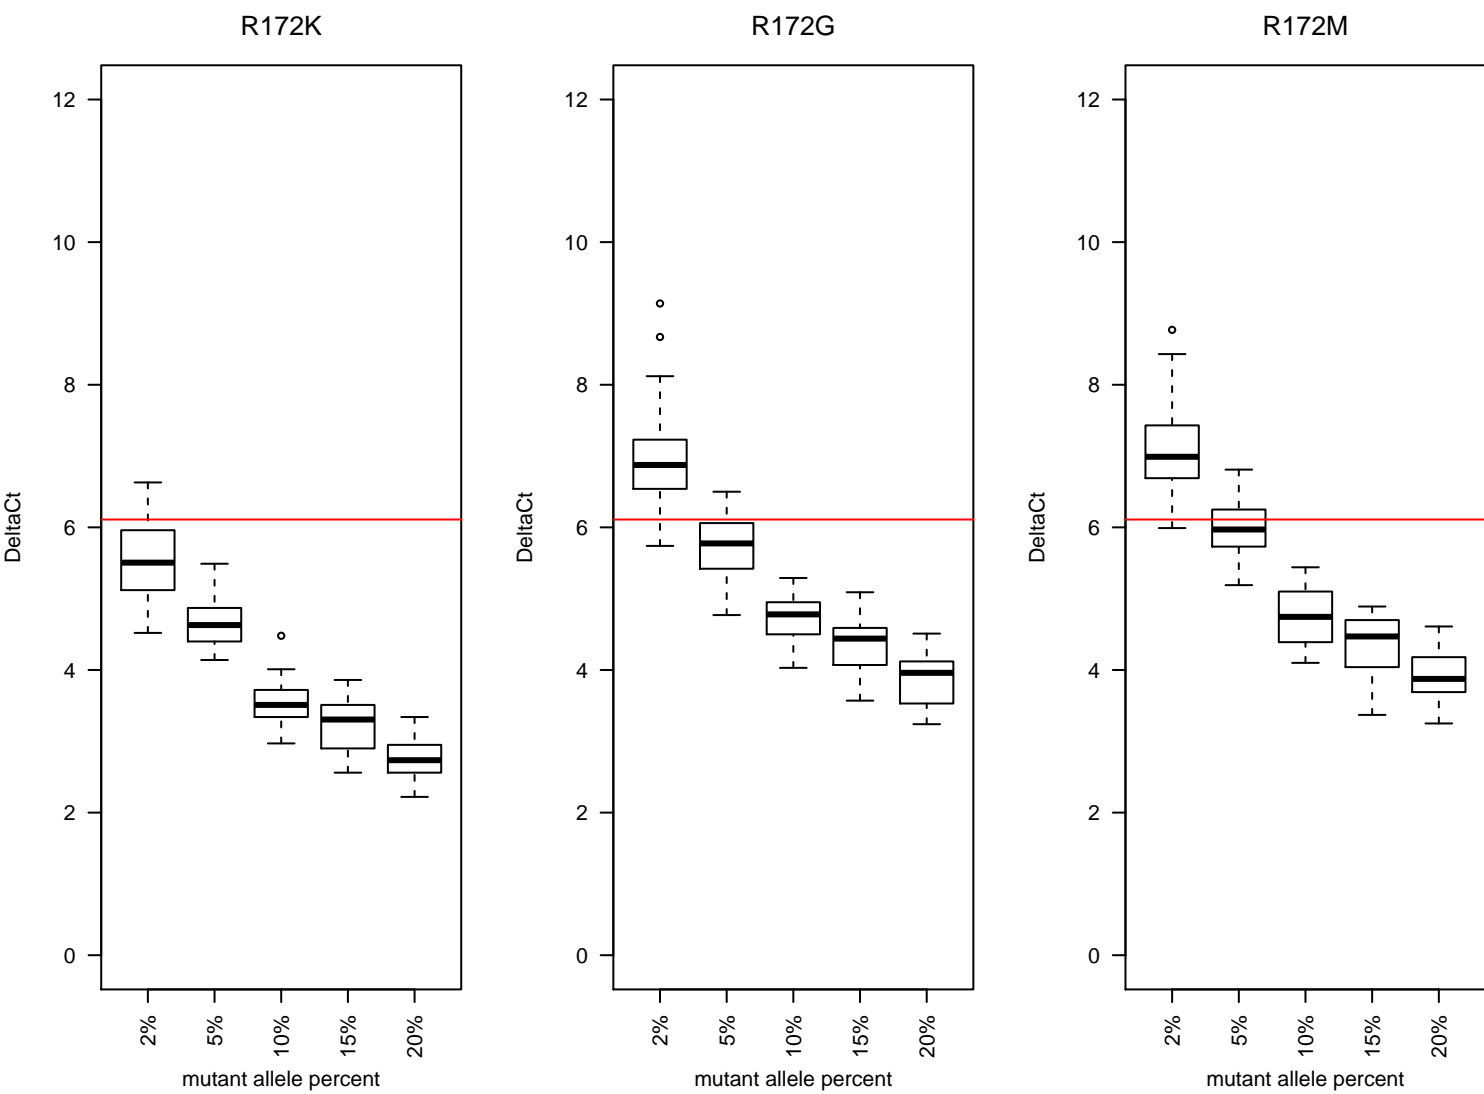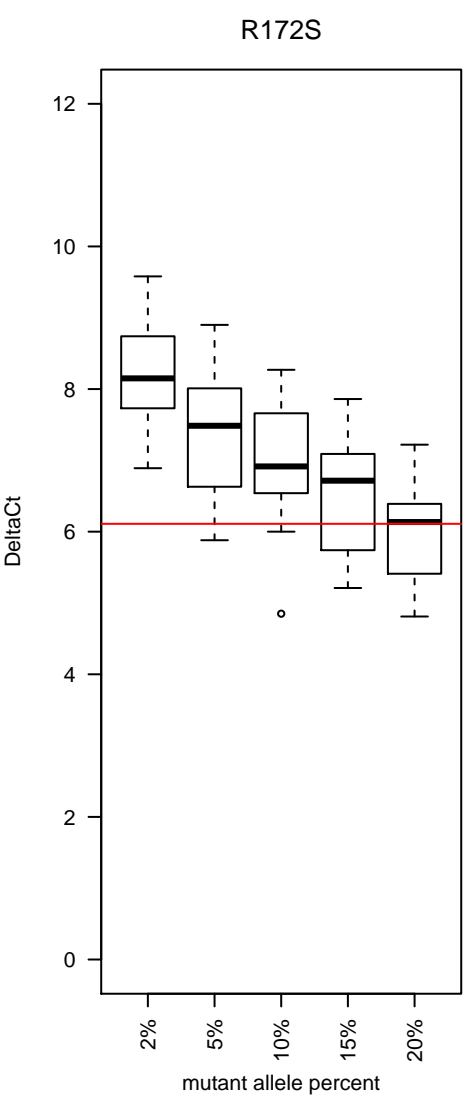

(D) R172 ARMS

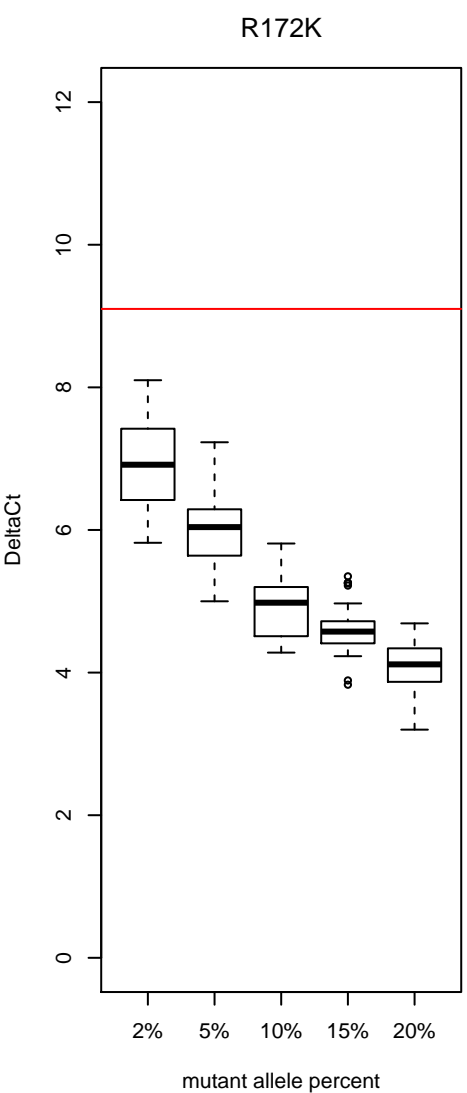

(E) R100 PCR-clamping

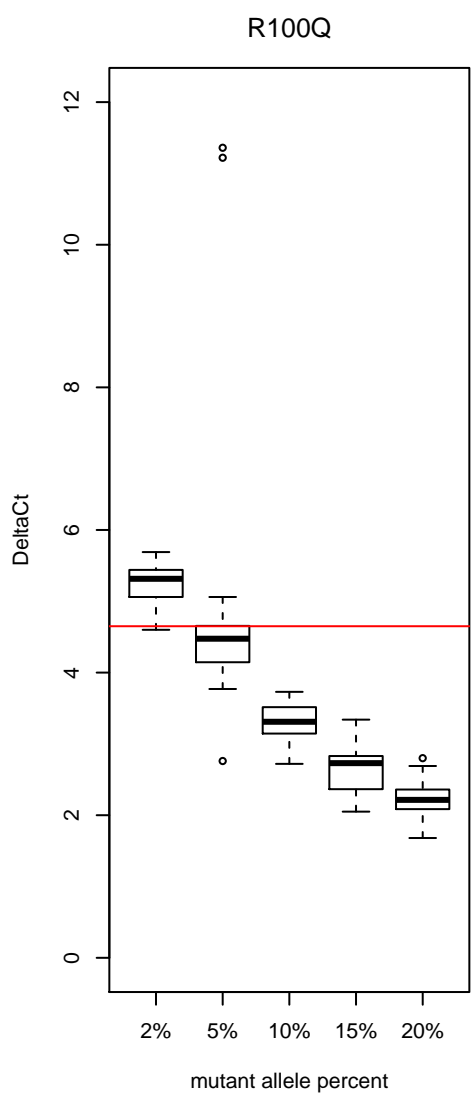

Supplement: 40478_2014_132_MOESM2_ESM.pdf [file 40478_2014_132_MOESM2_ESM.pdf]
